# Supplementary material
Source: MDPI journal article supplement (https://www.mdpi.com/1999-4907/10/12/1132)
Supplement: s1 [file s1]

## Supplementary Materials

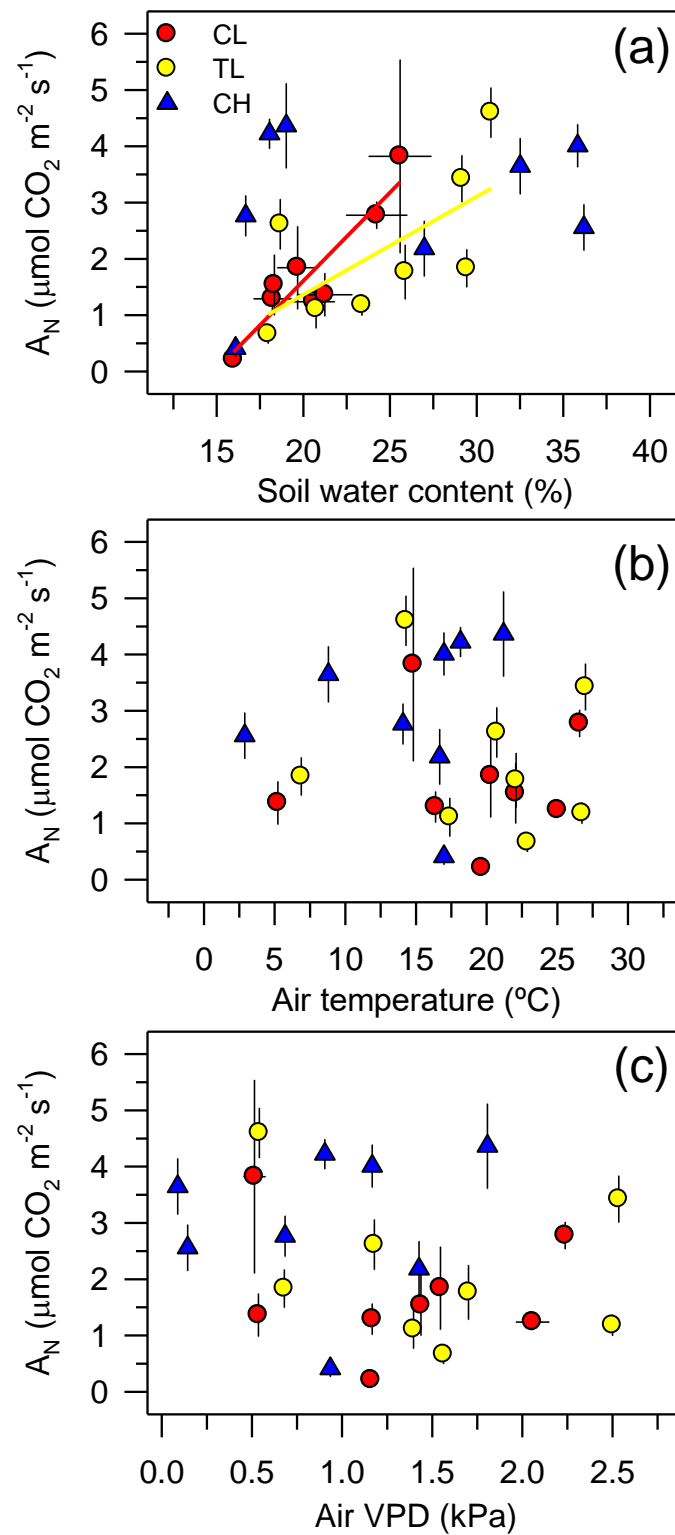

**Figure S1.** Relationships observed among photosynthetic rate ( $A_N$ ) and soil water content (a), air temperature (b), and air vapour pressure deficit (Air VPD, (c)) in control low-elevation (CL), thinning low-elevation (TL) and control high-elevation (CH) stands. Means  $\pm$  standard errors of the daily data are shown. Significant and marginally significant linear regressions are indicated: (a) CL  $p < 0.001$ , TL  $p = 0.07$ .

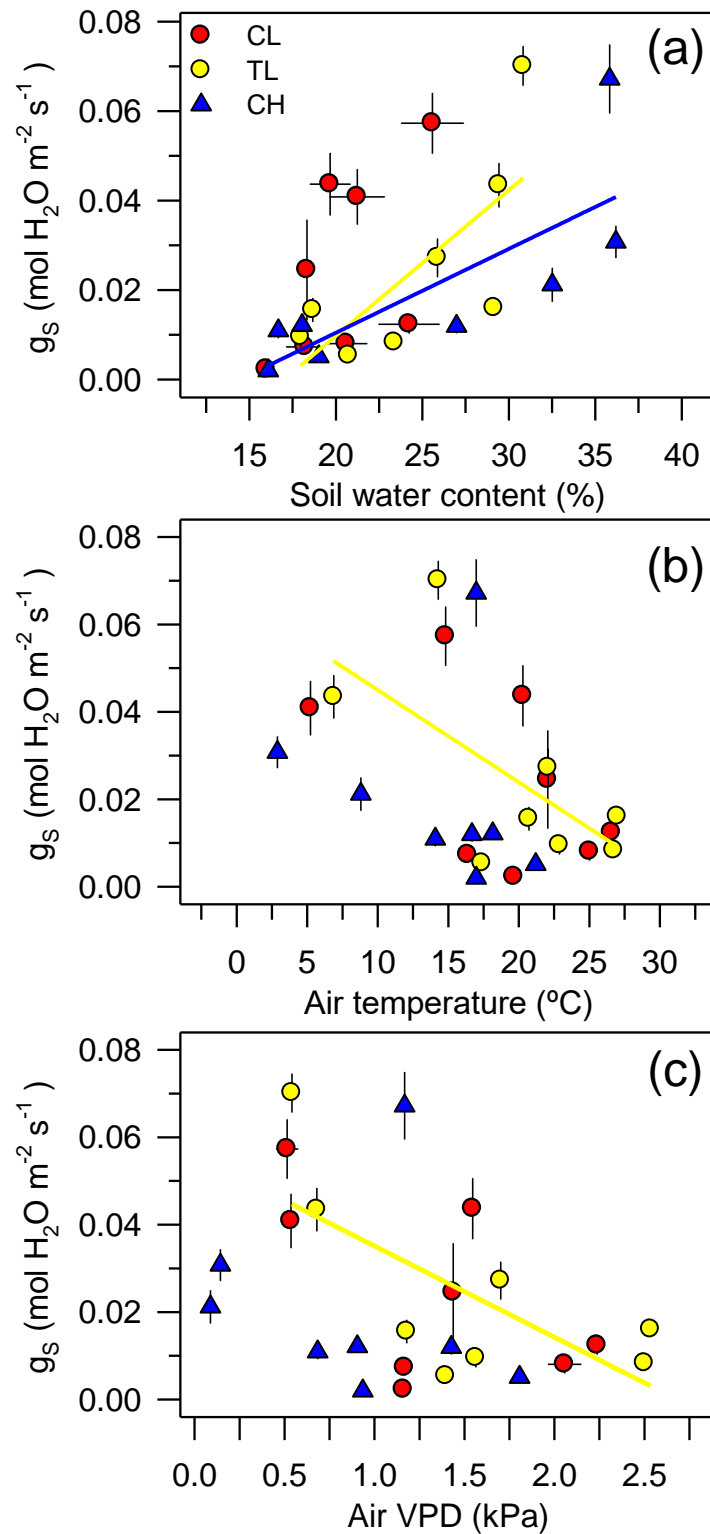

**Figure S2.** Relationships observed among stomatal conductance ( $g_s$ ) and soil water content (a), air temperature (b), and air vapour pressure deficit (Air VPD, (c)) in control low-elevation (CL), thinning low-elevation (TL) and control high-elevation (CH) stands. Means  $\pm$  standard errors of the daily data are shown. Significant and marginally significant linear regressions are indicated: (a) TL  $p=0.03$ , CH  $p<0.02$ ; (b) TL  $p=0.09$ ; (c) TL  $p=0.06$ .

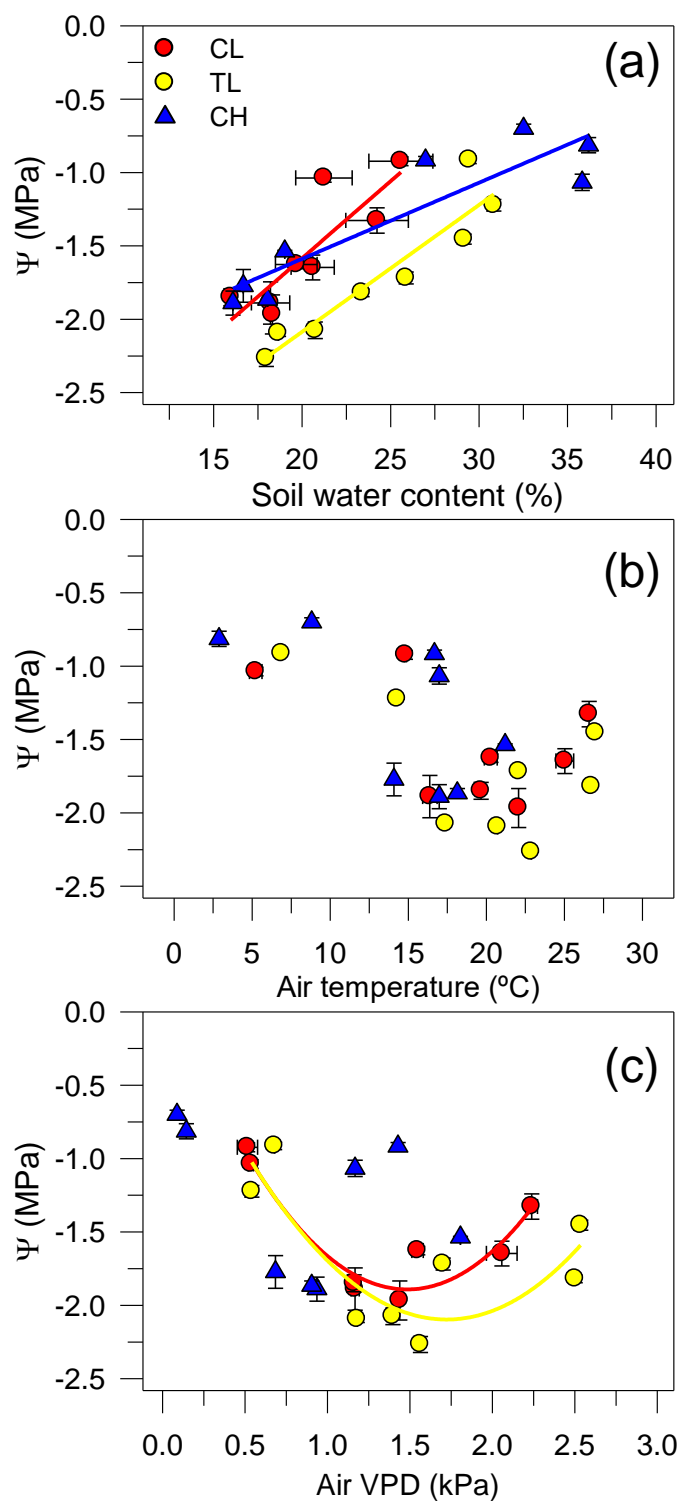

**Figure S3.** Relationships observed among xylem water potential ( $\Psi$ ) and soil water content (a), air temperature (b), and air vapour pressure deficit (Air VPD, (c)) in control low-elevation (CL), thinning low-elevation (TL) and control high-elevation (CH) stands. Means  $\pm$  standard errors of the daily data are shown. Significant and marginally significant regressions are indicated: (a)  $p < 0.01$  in all the regressions using linear relationships; (c) CL  $p < 0.01$ , TL  $p = 0.05$  using polynomial quadratic relationships.
